# Supplementary material for: Synthesis of xanthene derivatives by employing Fe3O4nanoparticles as an effective and magnetically recoverable catalyst in water
Source: Royal Society of Chemistry journal article supplement (doi:10.1039/c1cy00289a), 2011-10-27
Supplement: c1cy00289a.pdf [file c1cy00289a.pdf]

## Supplementary materials

### Journal: Catalysis Science & Technology

#### **Synthesis of xanthene derivatives by employing Fe<sub>3</sub>O<sub>4</sub> nanoparticles as an effective and magnetically recoverable catalyst in water**

**Bahador Karami<sup>a\*</sup>, S. Jafar Hoseini<sup>a</sup>, Khalil Eskandari<sup>a</sup>, Abdolmohammad Ghasemi<sup>b</sup>, Hassan Nasrabadi<sup>a</sup>**

<sup>a</sup>Department of Chemistry, Yasouj University, Yasouj, Iran. Fax: +98 7412224167; Tel.: +98 7412223048; E-mail: karami@mail.yu.ac.ir

<sup>b</sup>Islamic Azad University, Gachsaran Branch, Gachsaran, Iran.

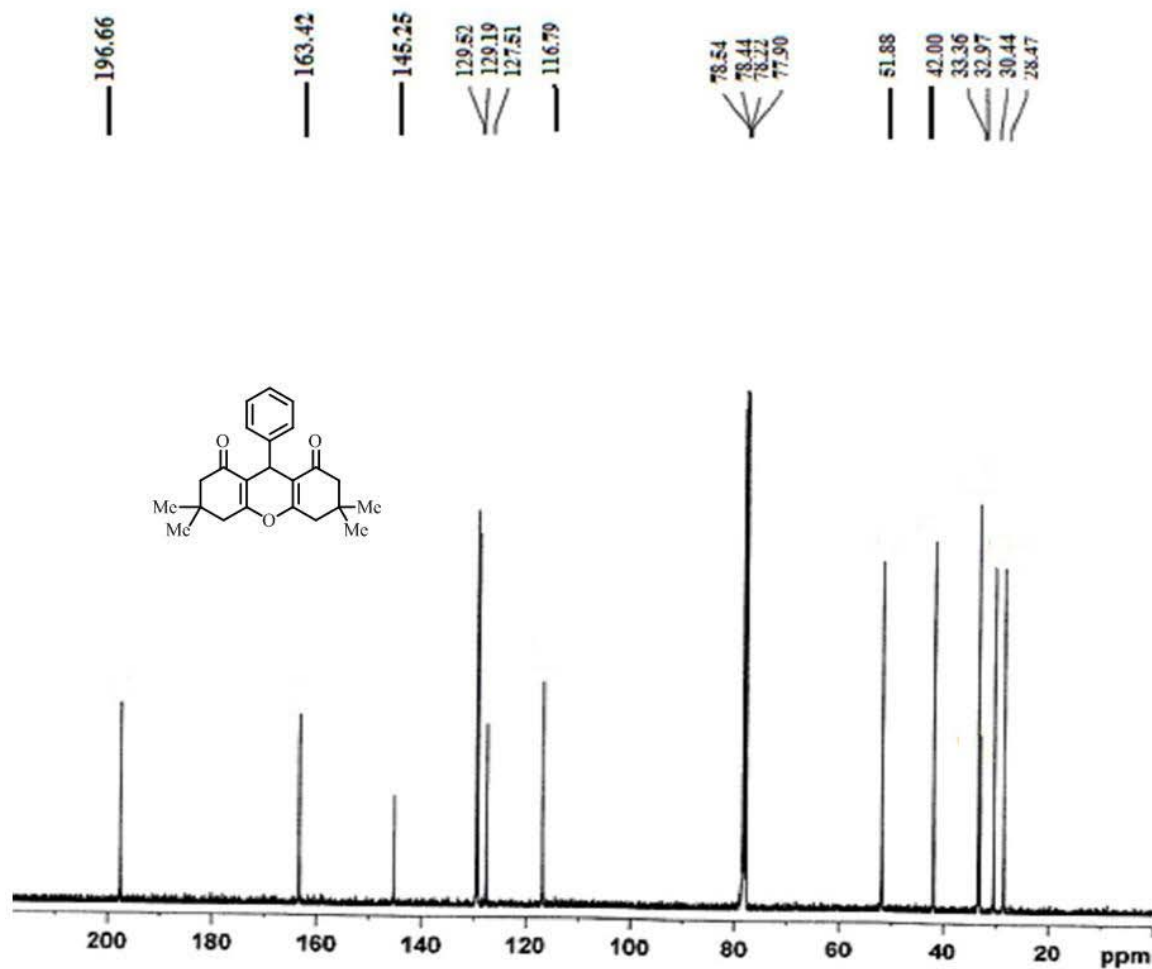

CNMR-Table 1, entry 1

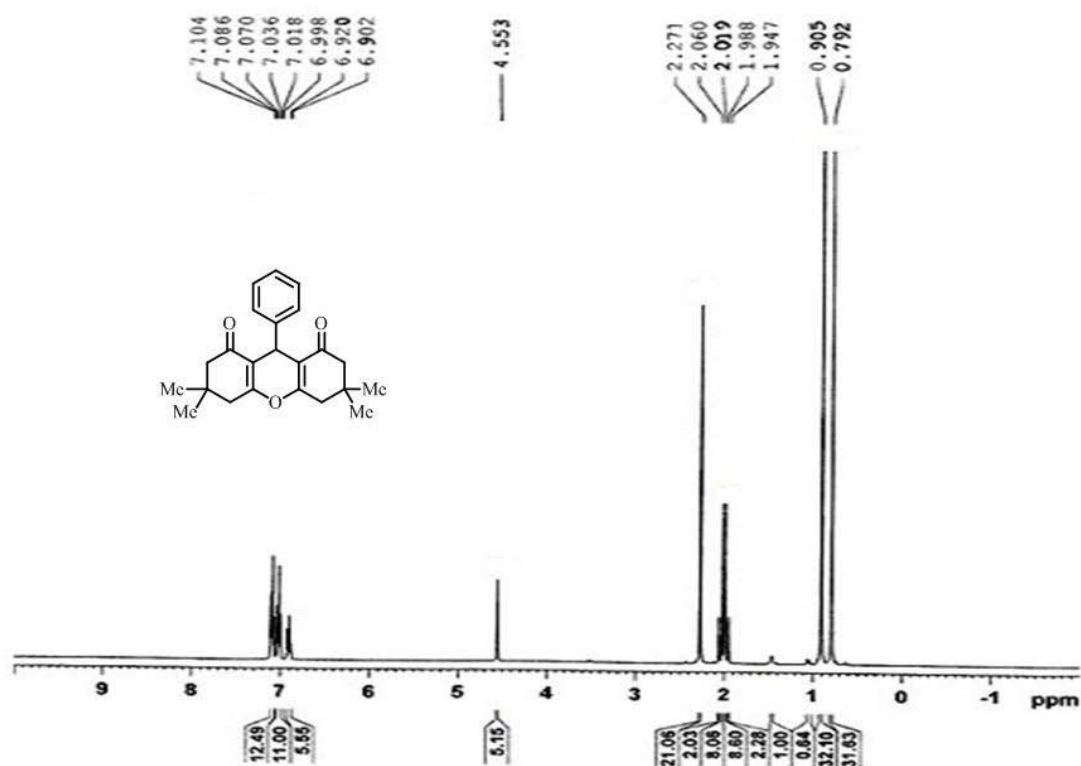

HNMR-Table 1, entry 1

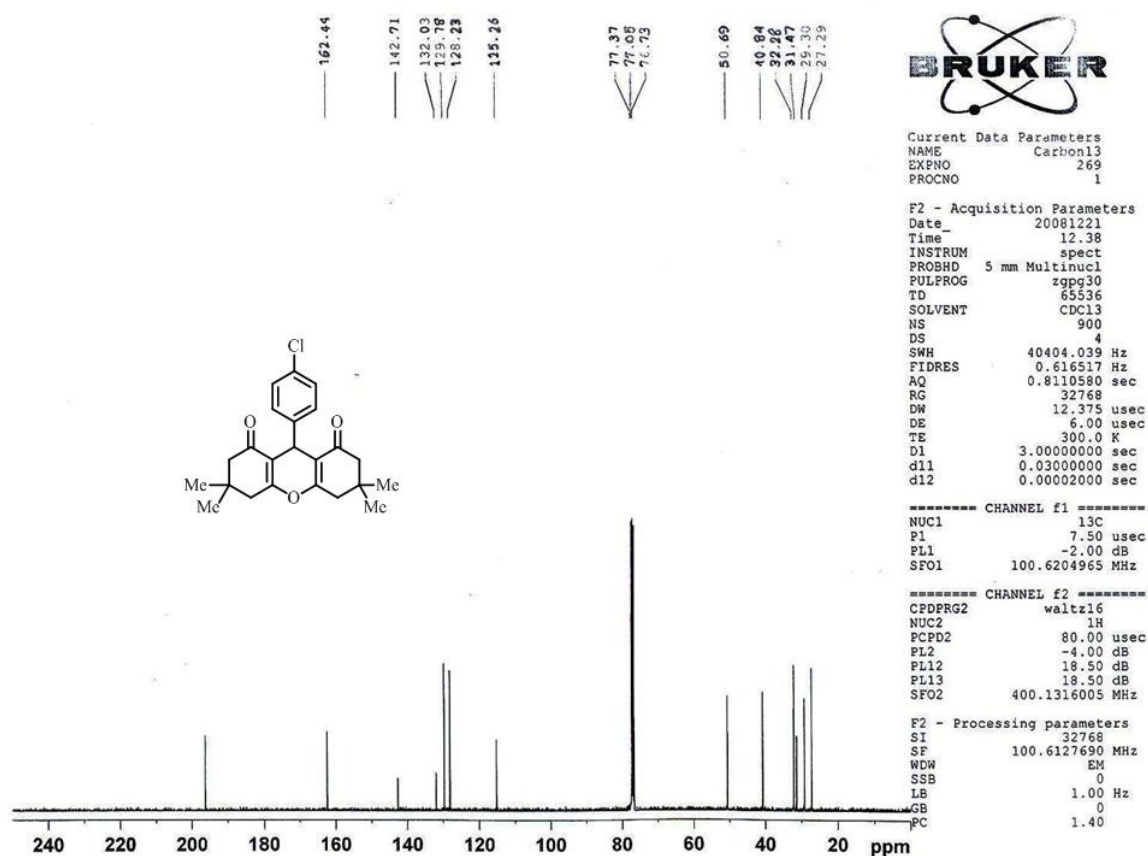

CNMR-Table 1, entry 2

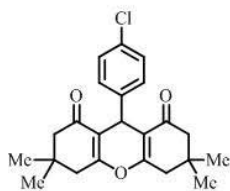

HNMR-Table 1, entry 2

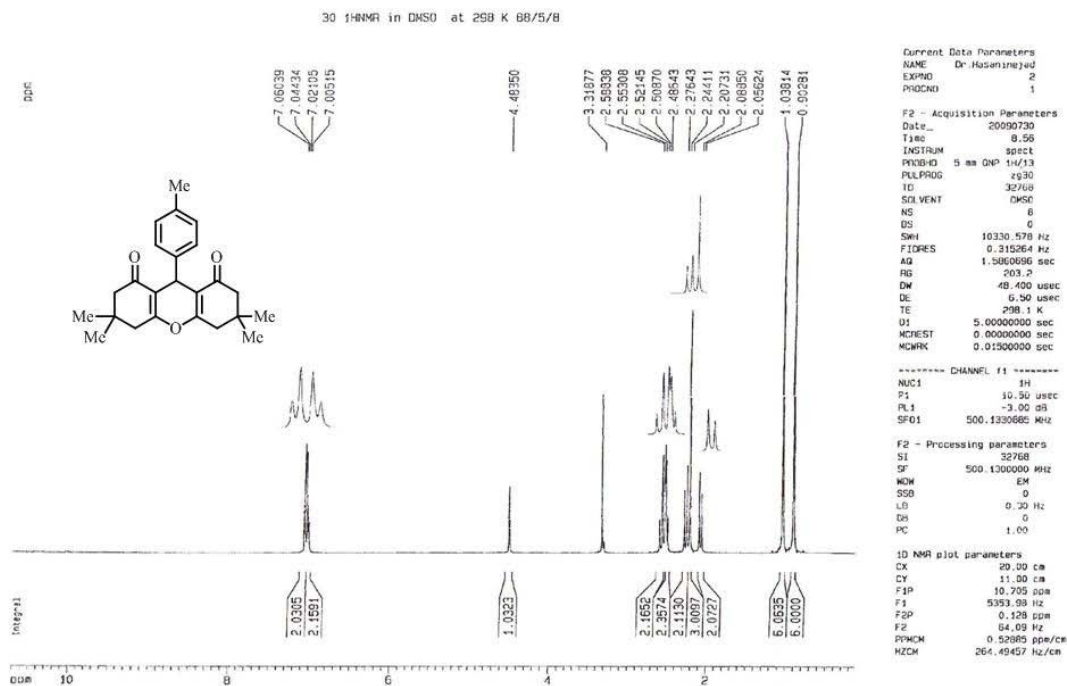

HNMR-Table 1, entry 3

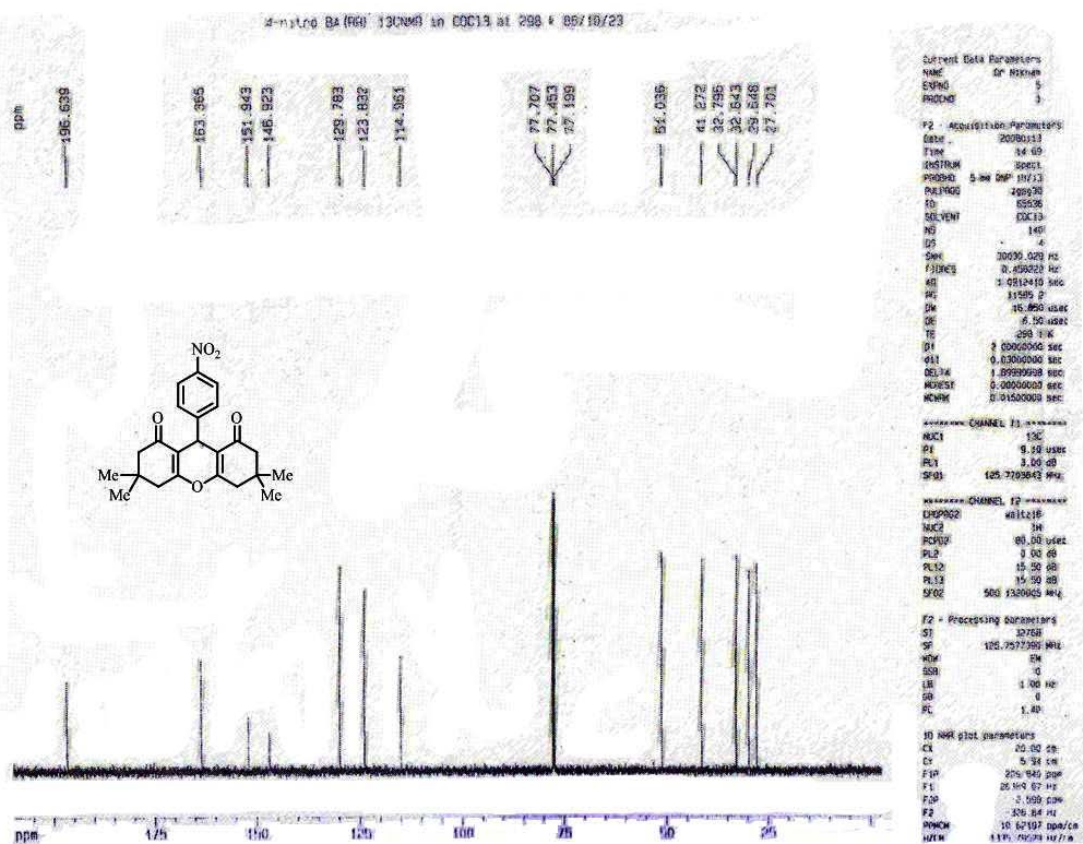

CNMR-Table 1, entry 4

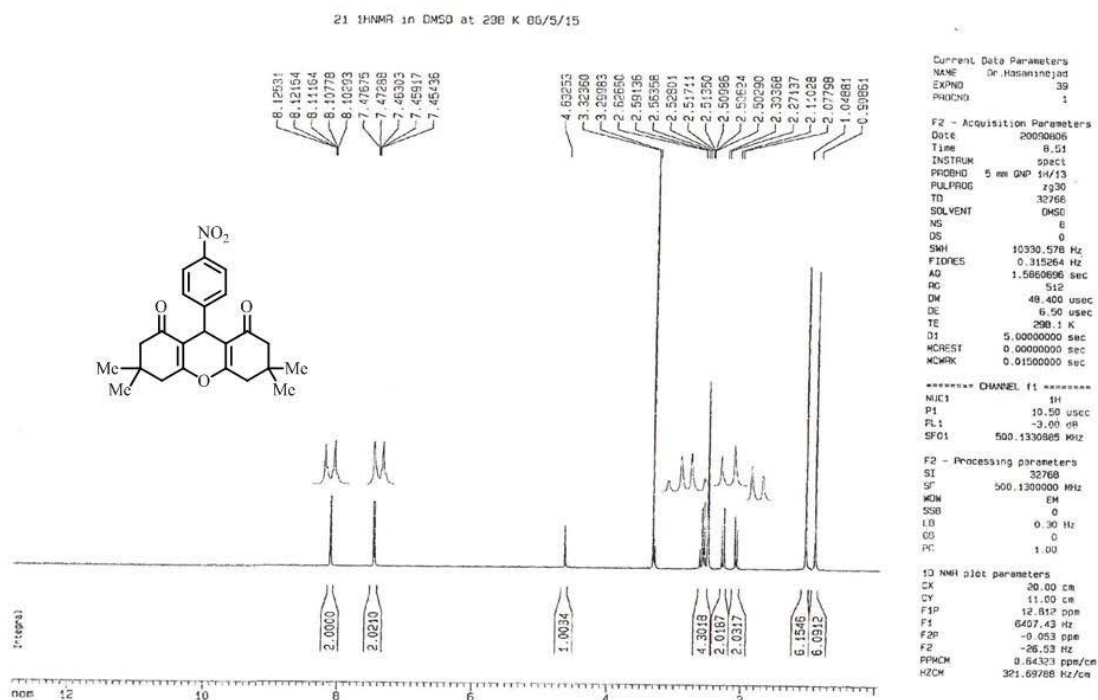

HNMR-Table 1, entry 4



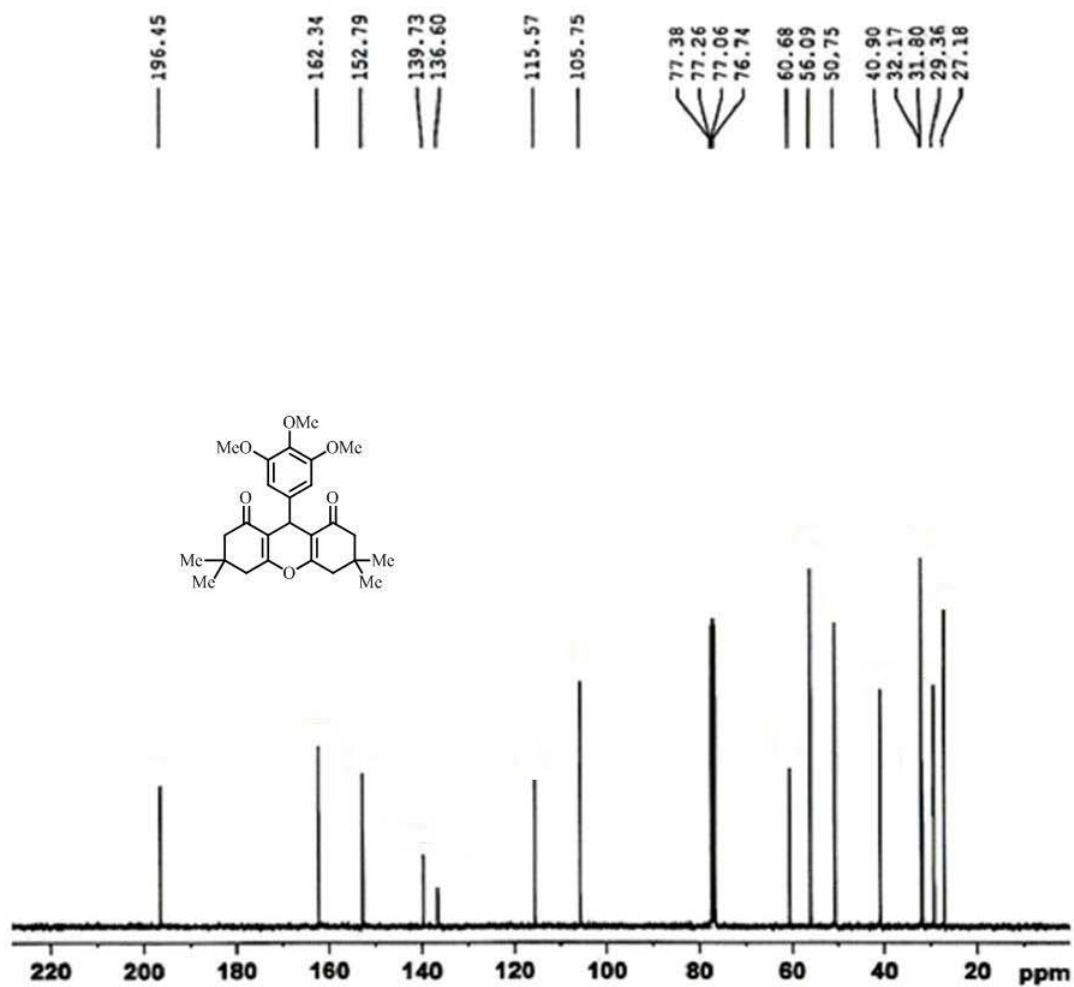

CNMR-Table 1, entry 6

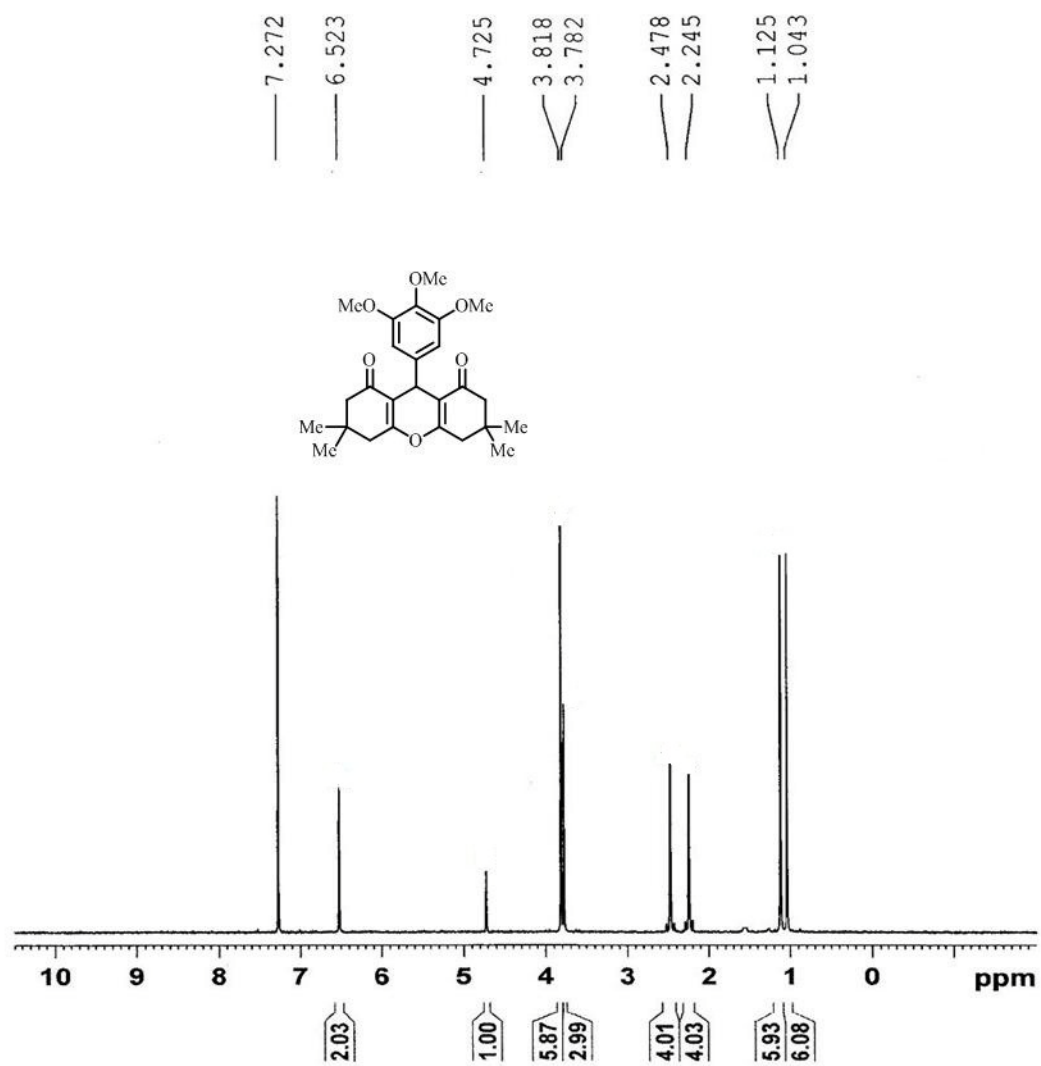

HNMR-Table 1, entry 6

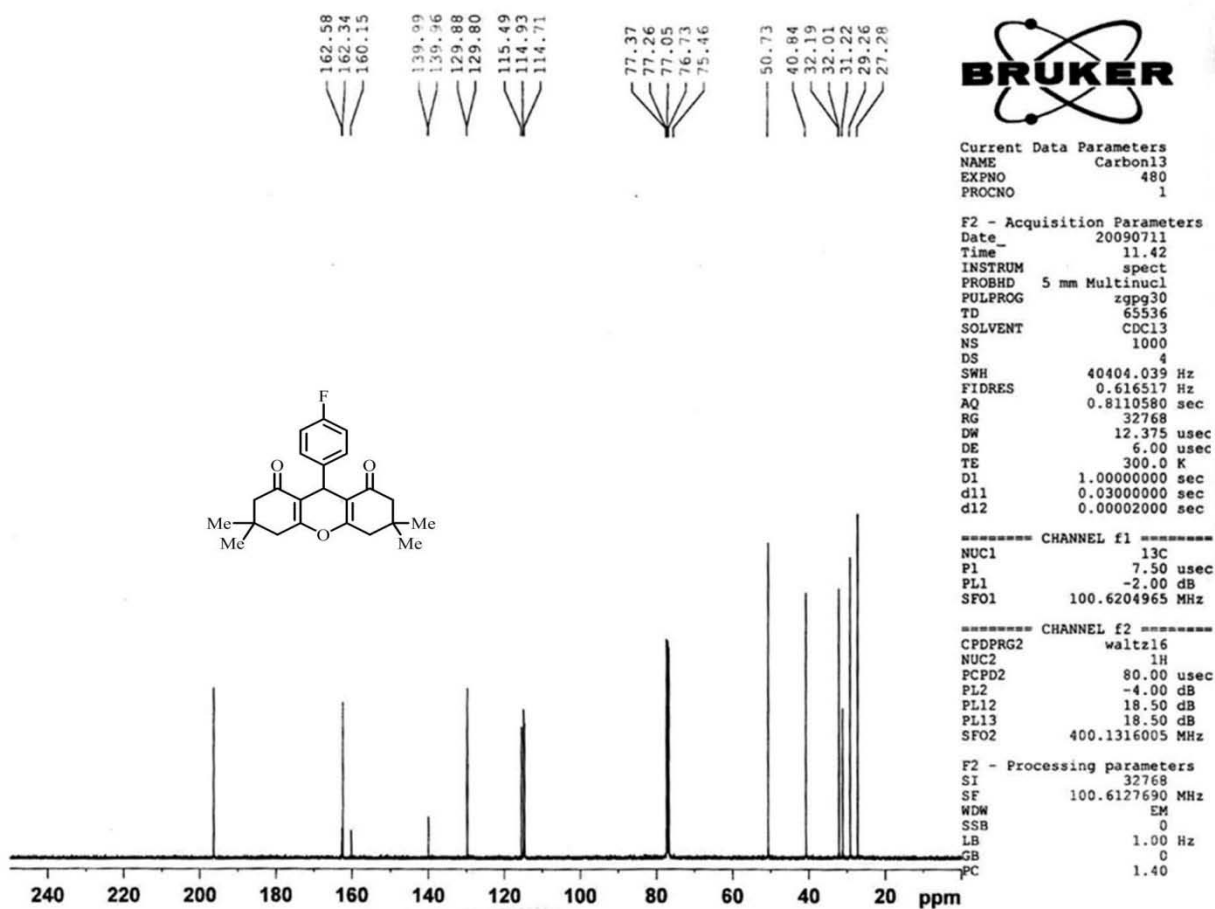

CNMR-Table 1, entry 7

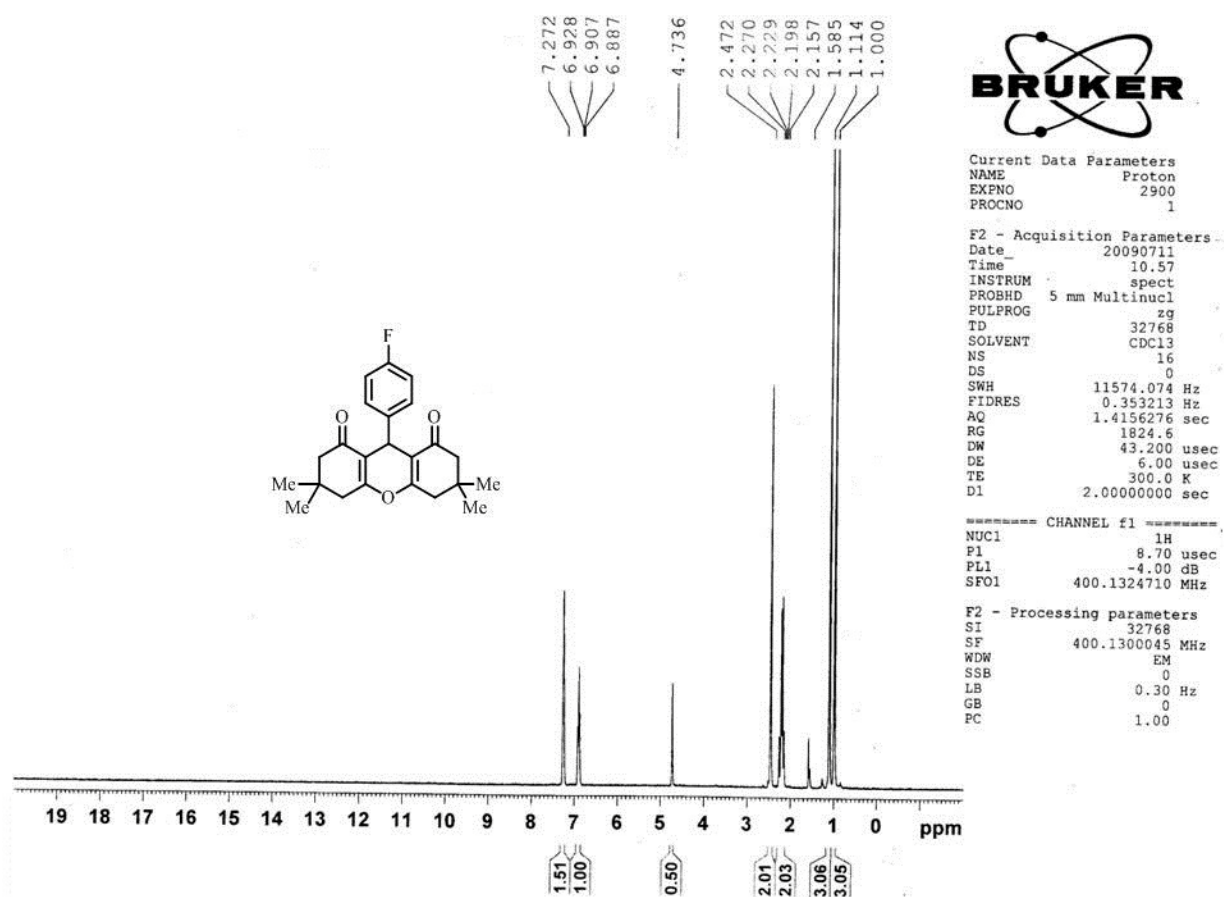

HNMR-Table 1, entry 7

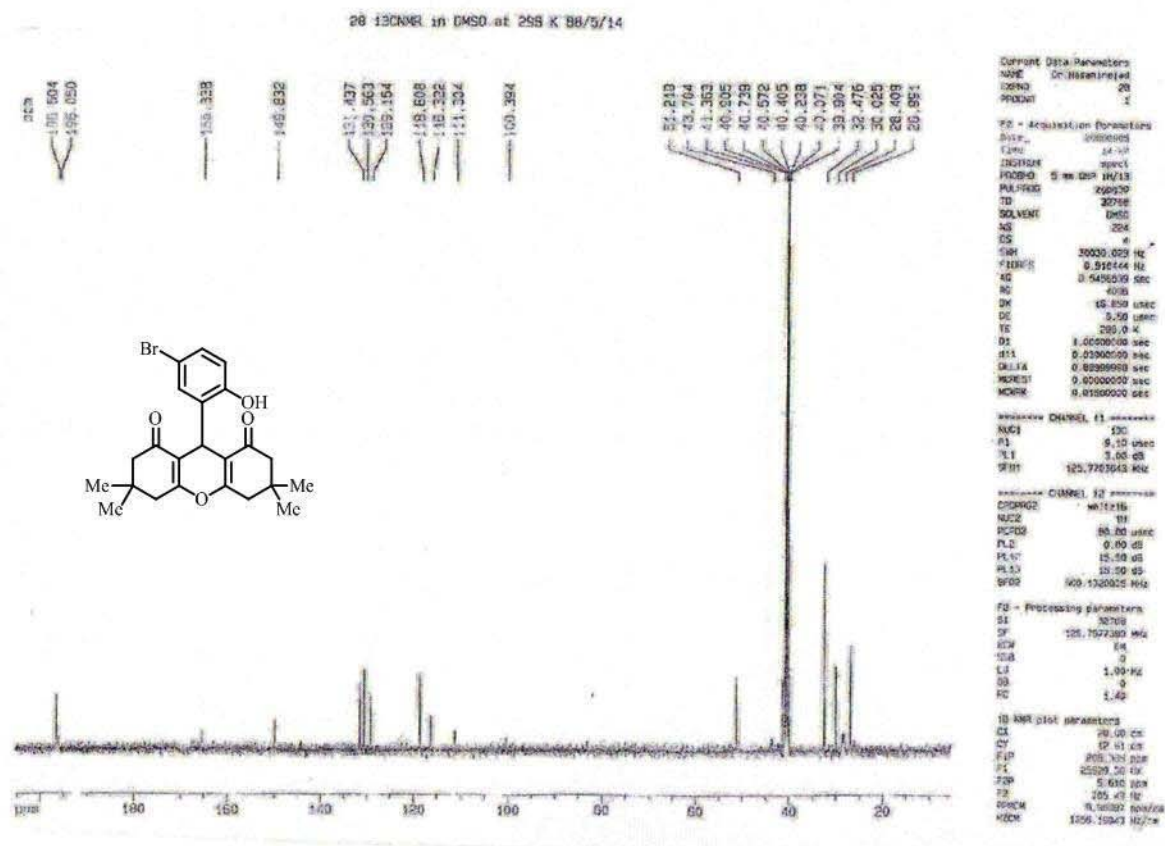

CNMR-Table 1, entry 8

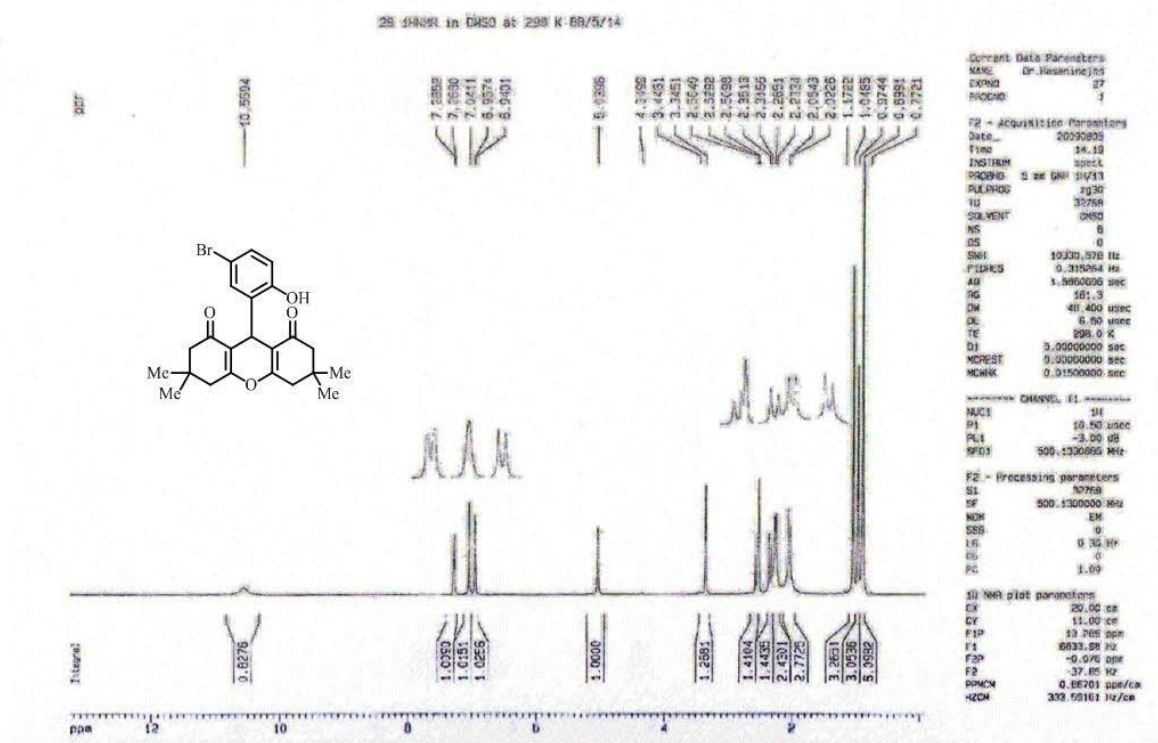

HNMR-Table 1, entry 8

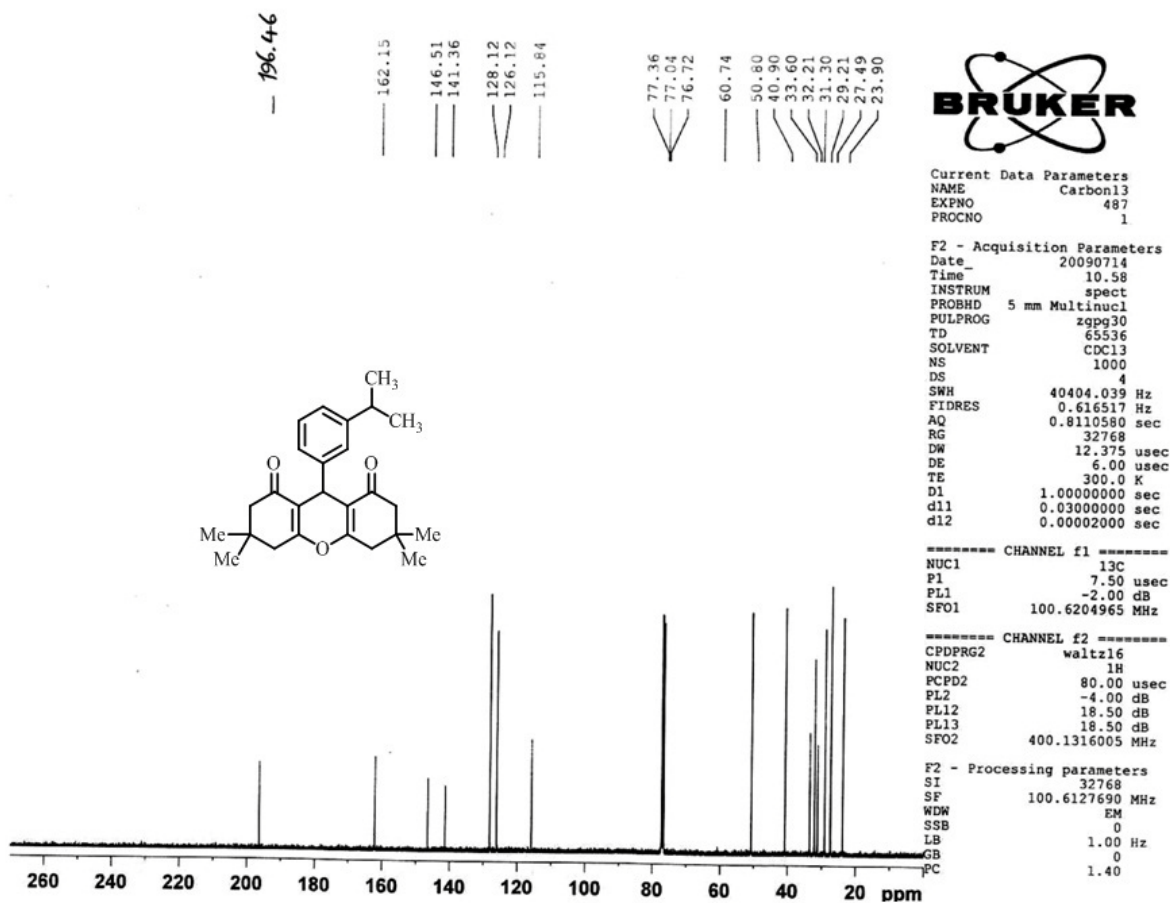

CNMR-Table 1, entry 9

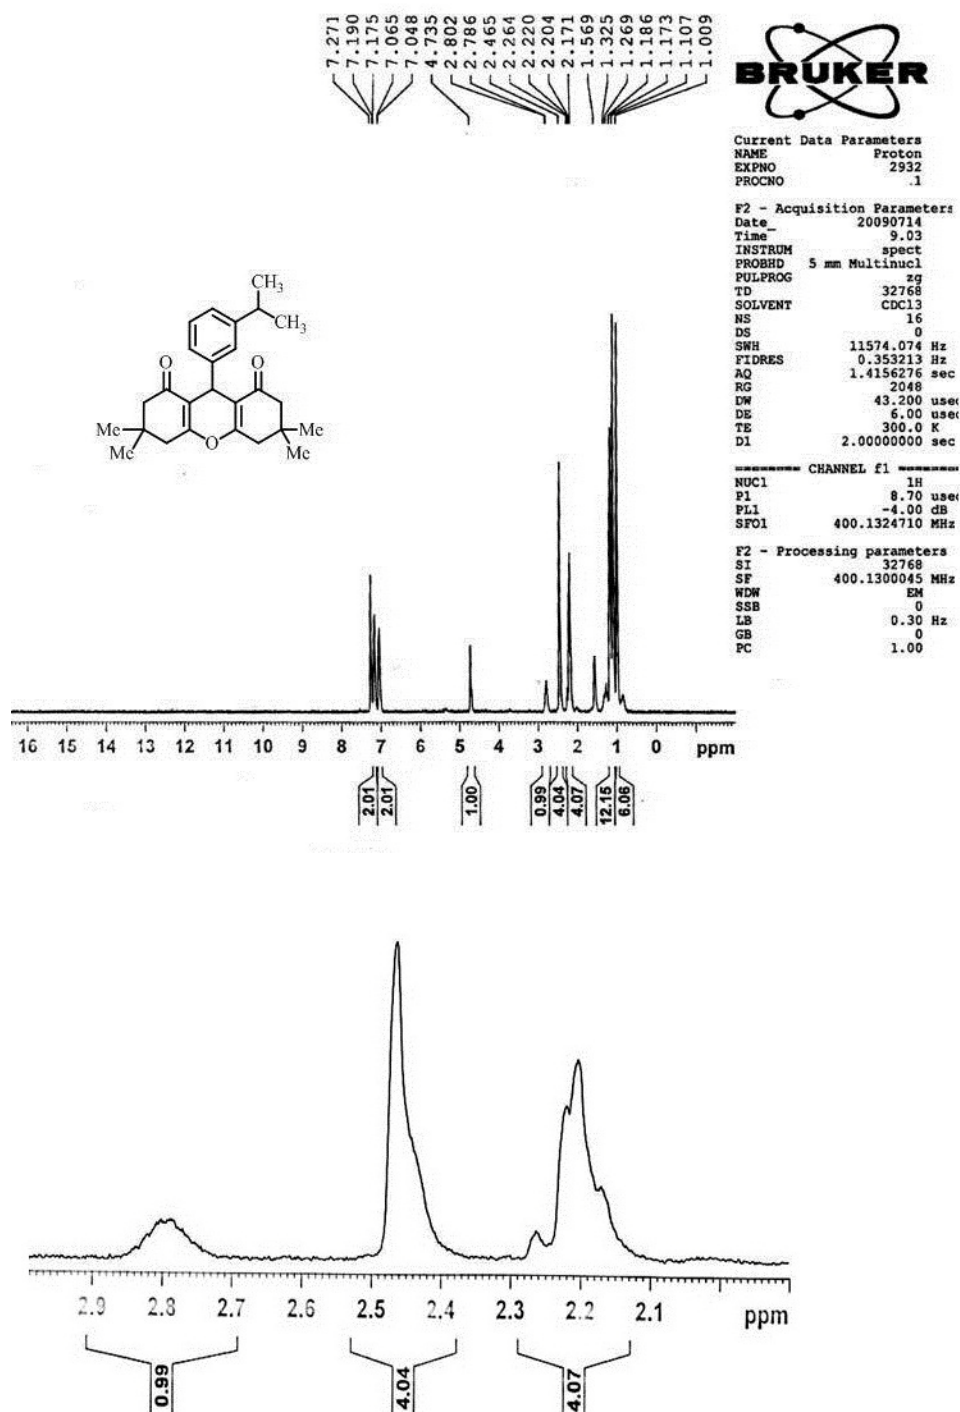

HNMR-Table 1, entry 9



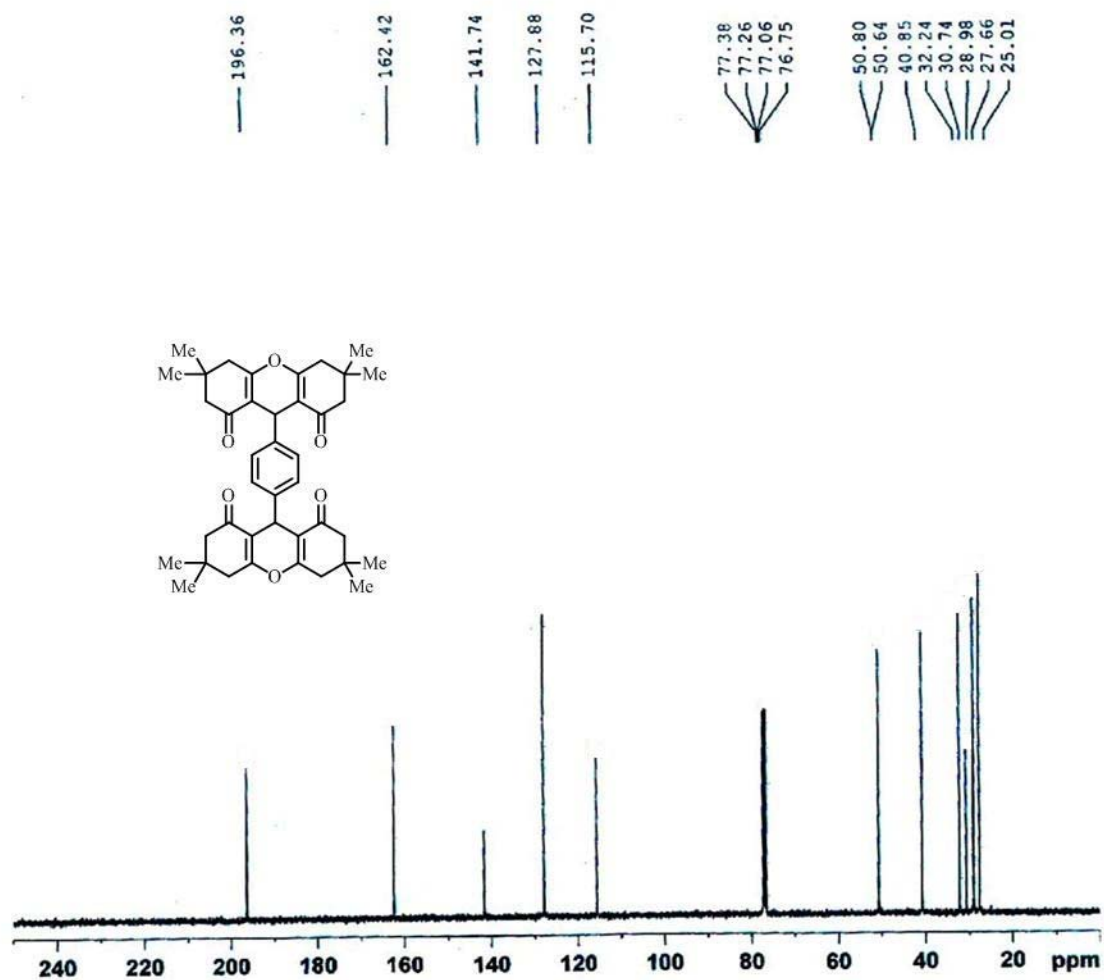

CNMR-Table 1, entry 11

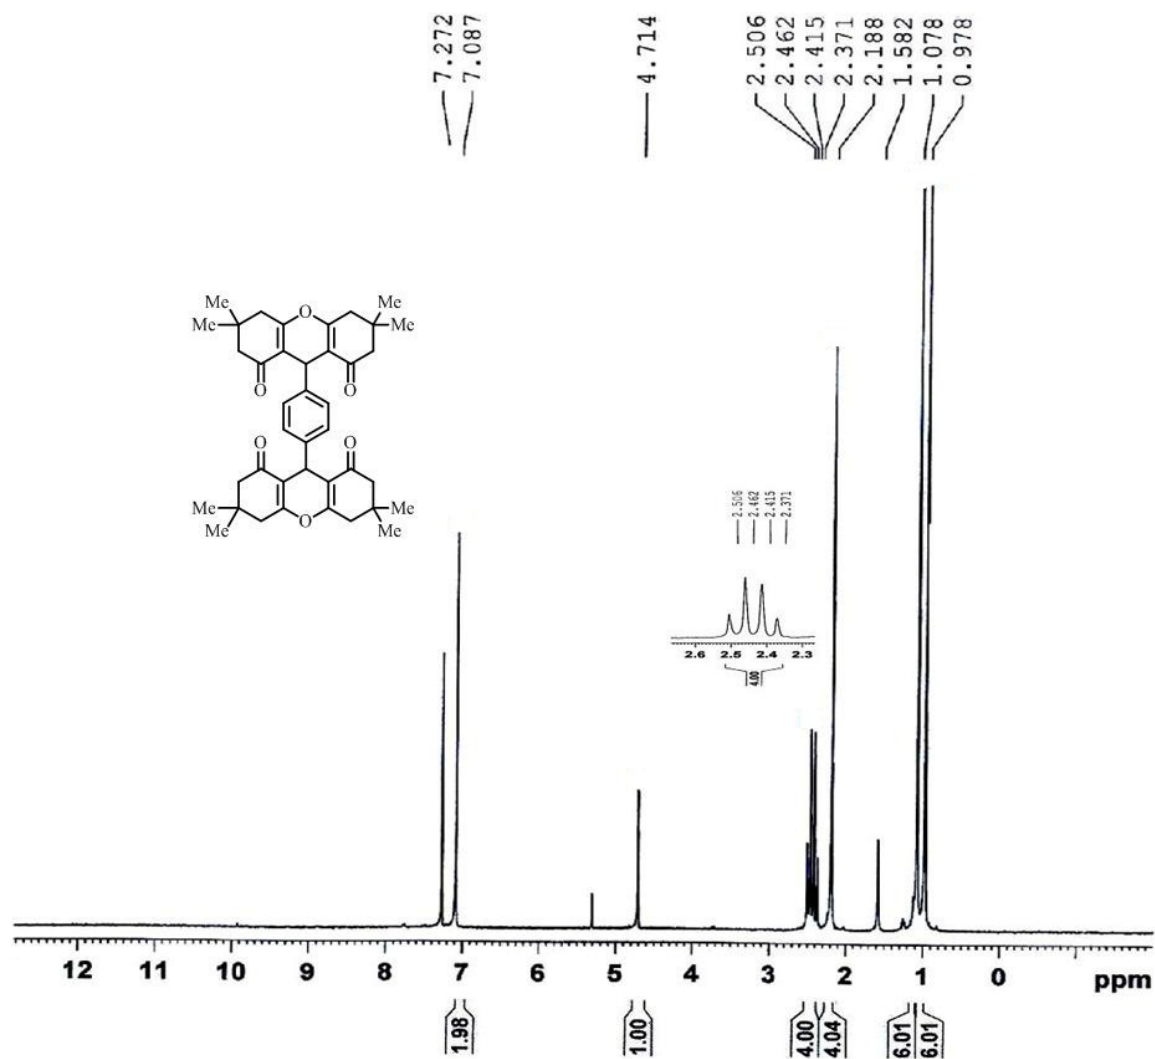

HNMR-Table 1, entry 11

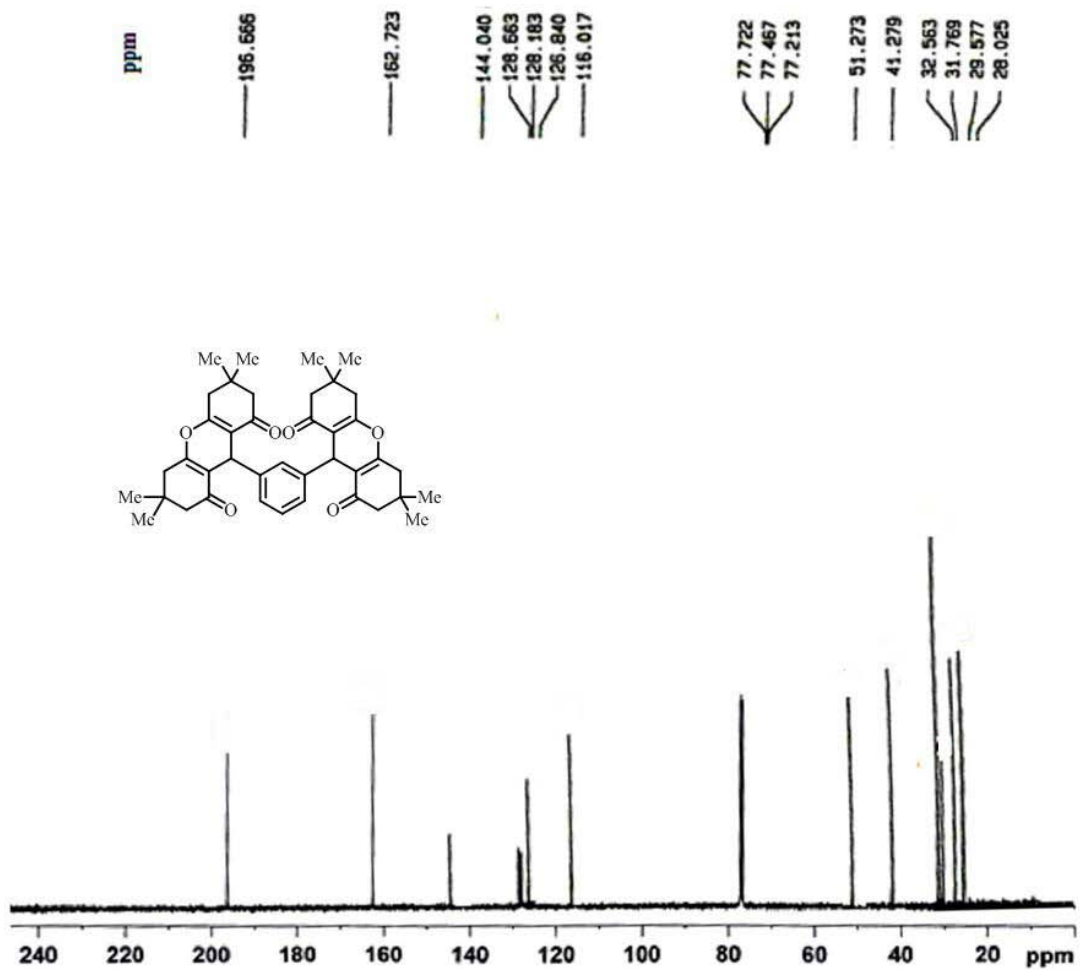

CNMR-Table 1, entry 12

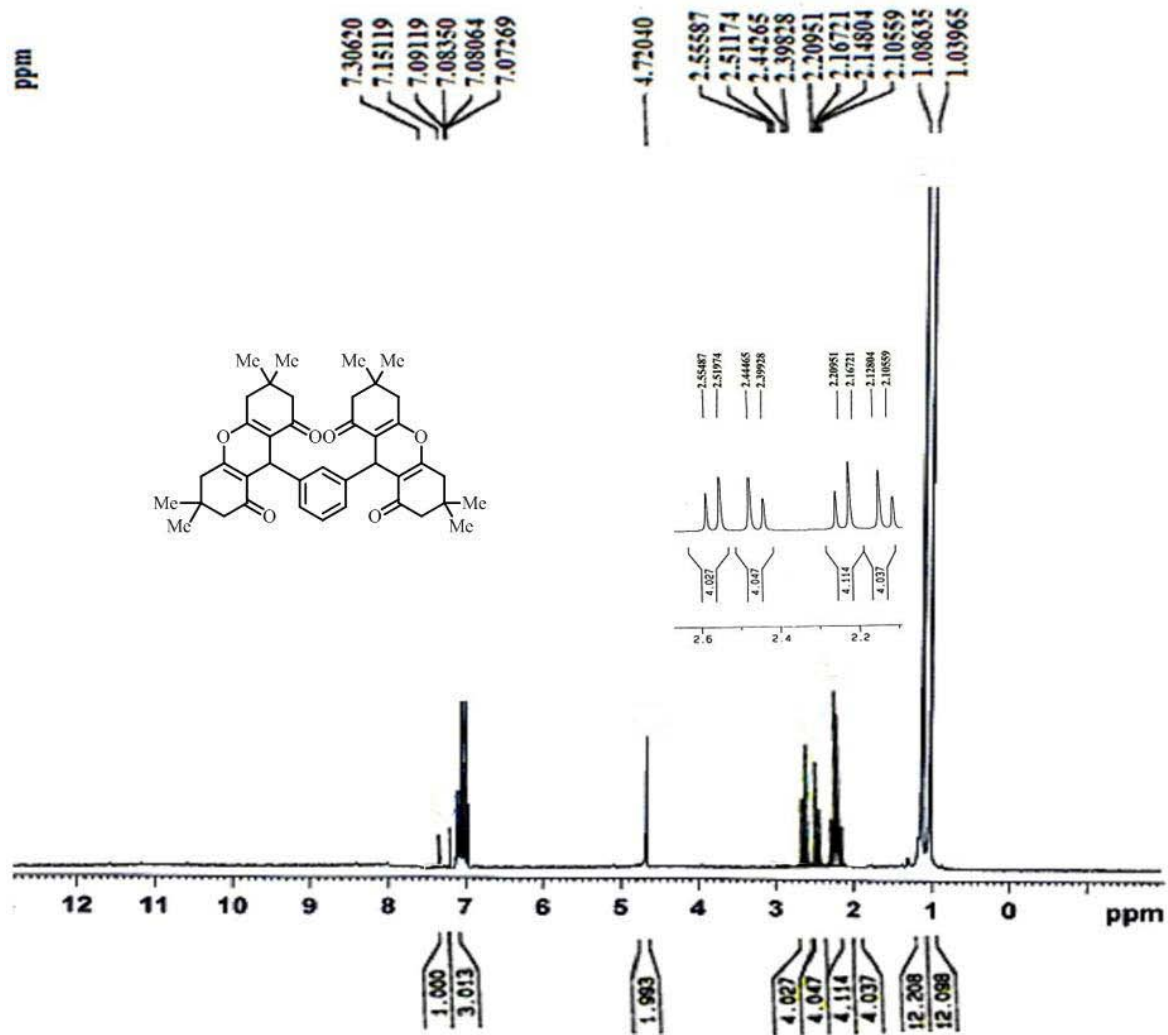

HNMR-Table 1, entry 12

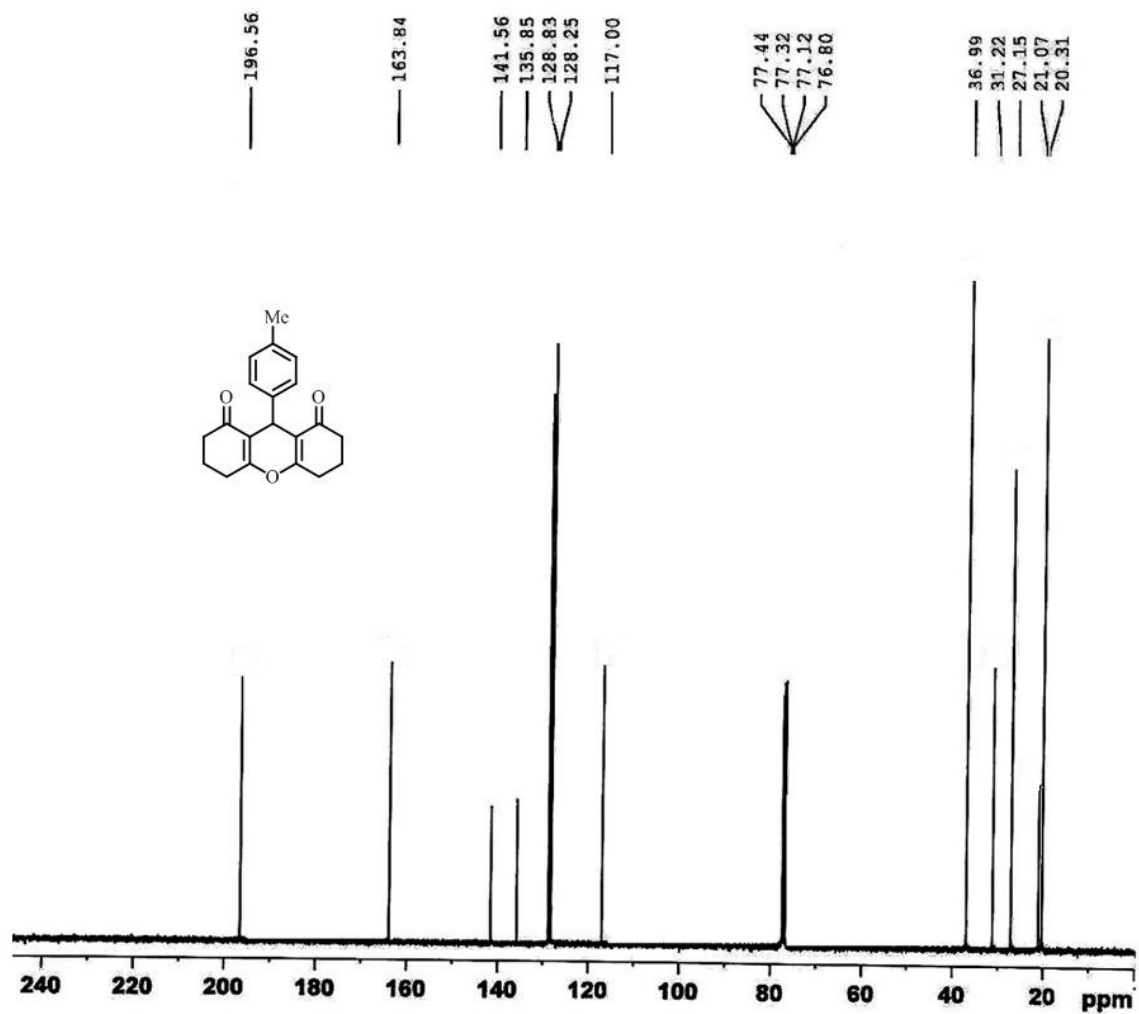

CNMR-Table 1, entry 14

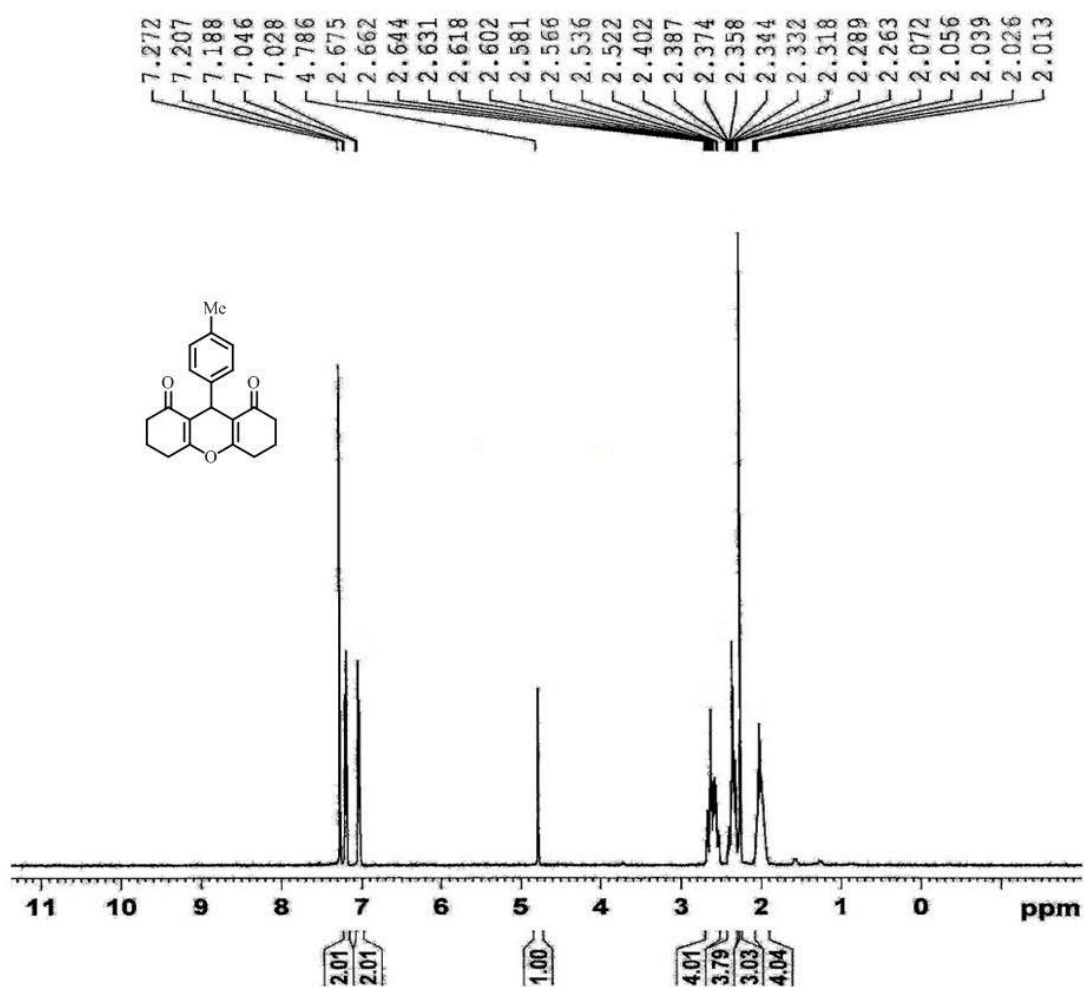

HNMR-Table 1, entry 14

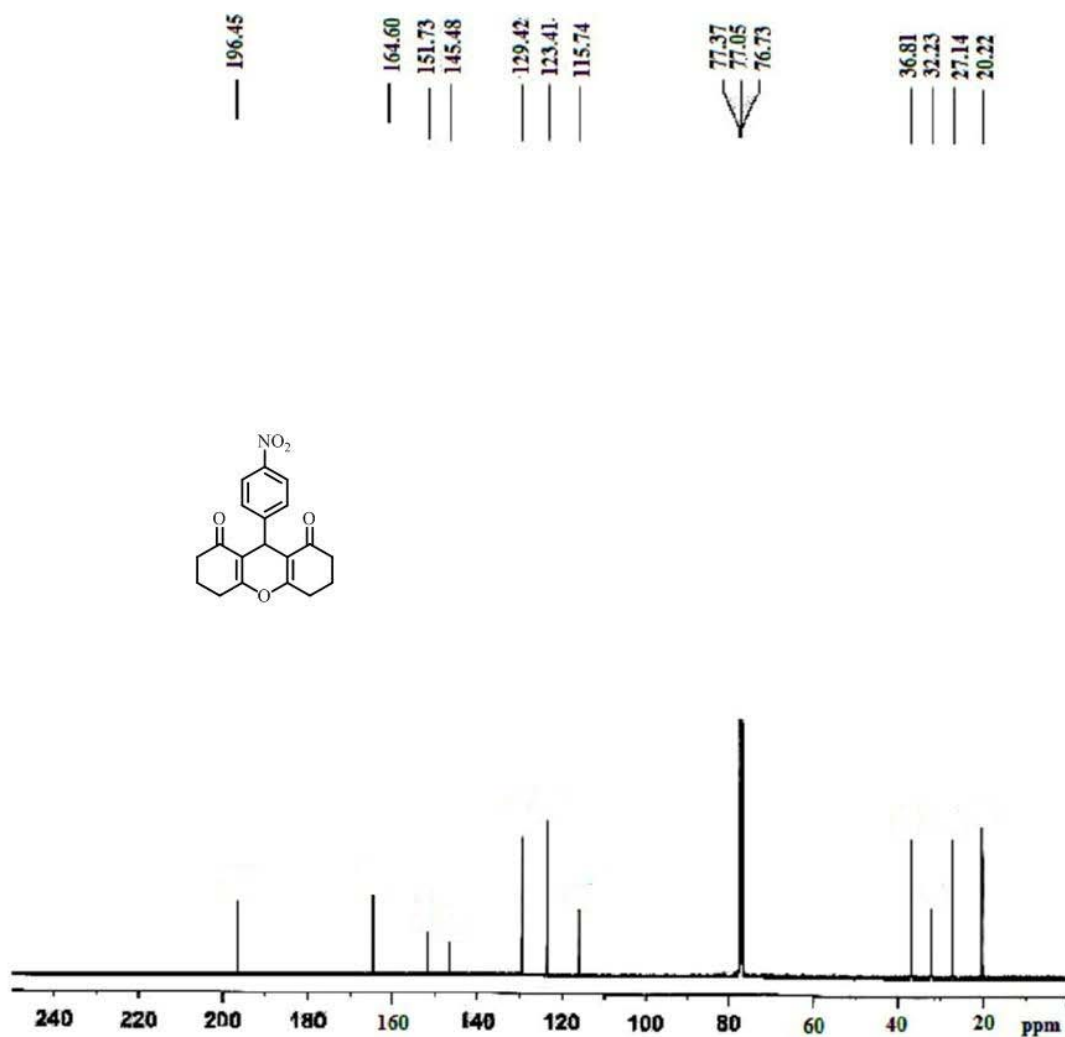

CNMR-Table 1, entry 15

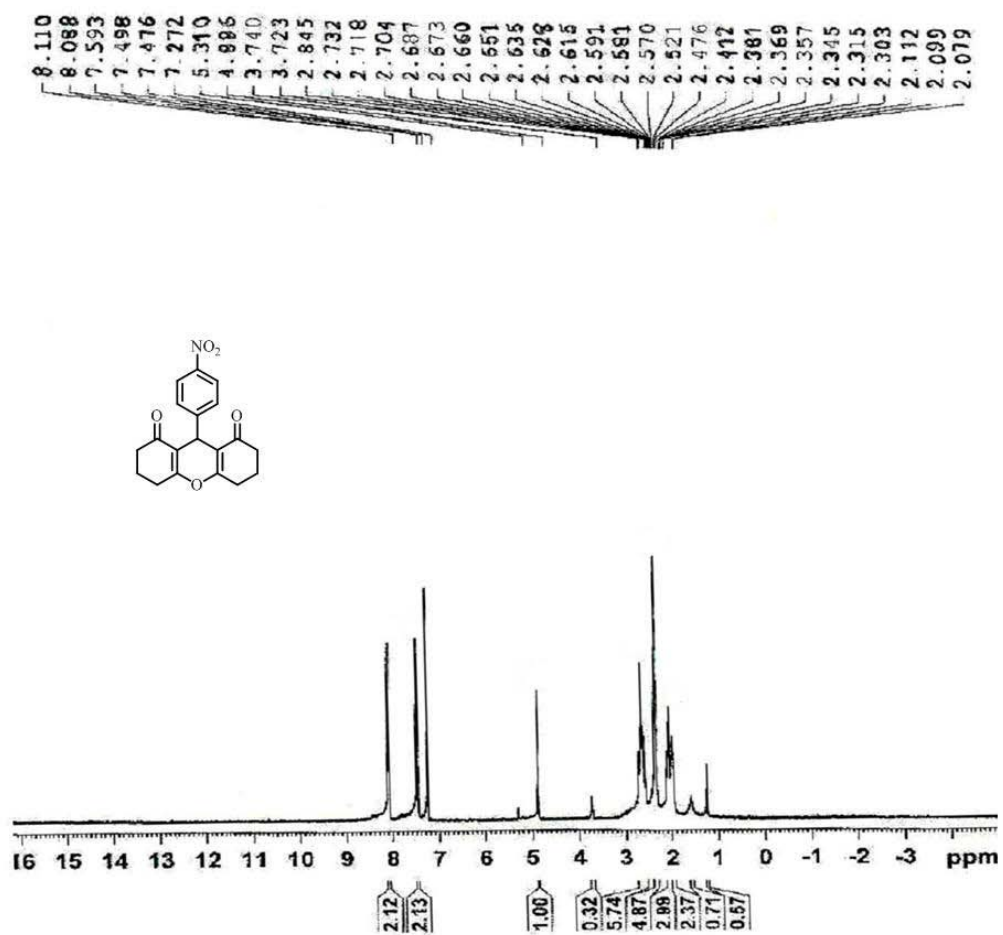

HNMR-Table 1, entry 15



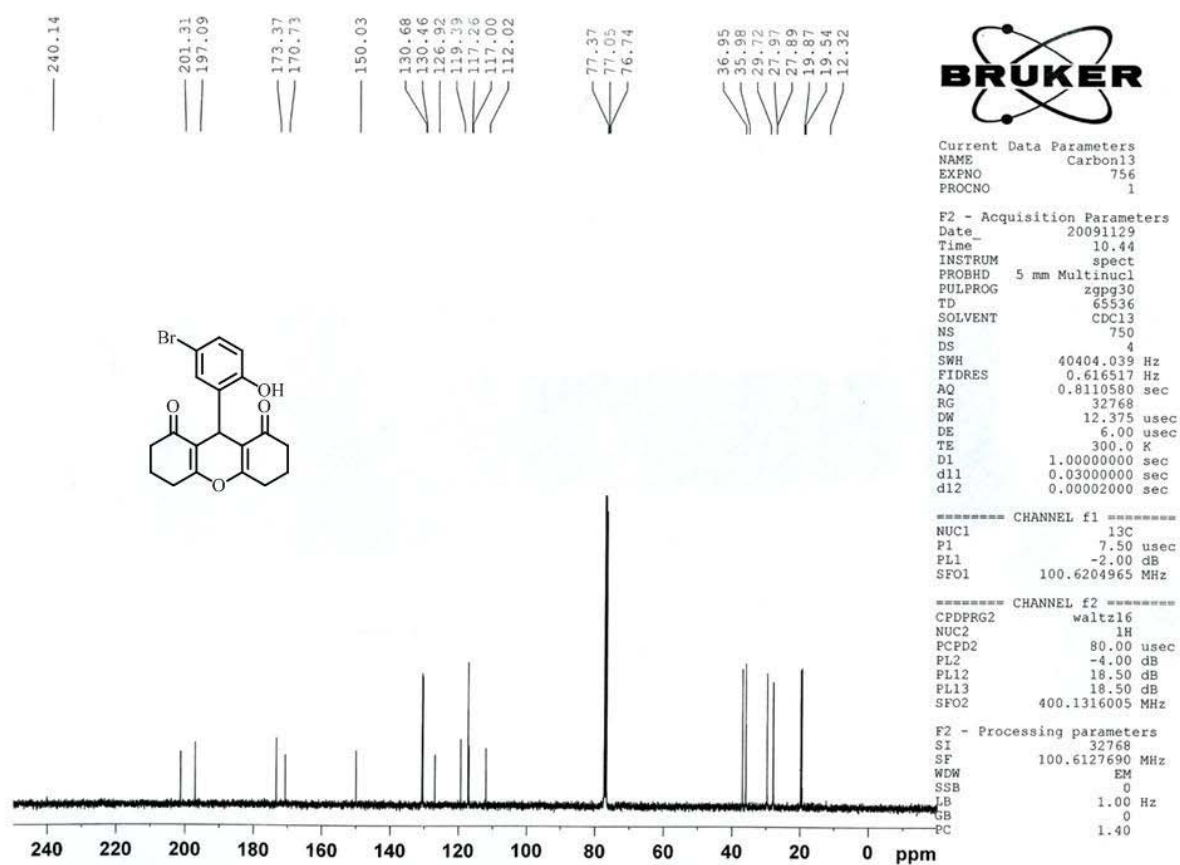

CNMR-Table 1, entry 16

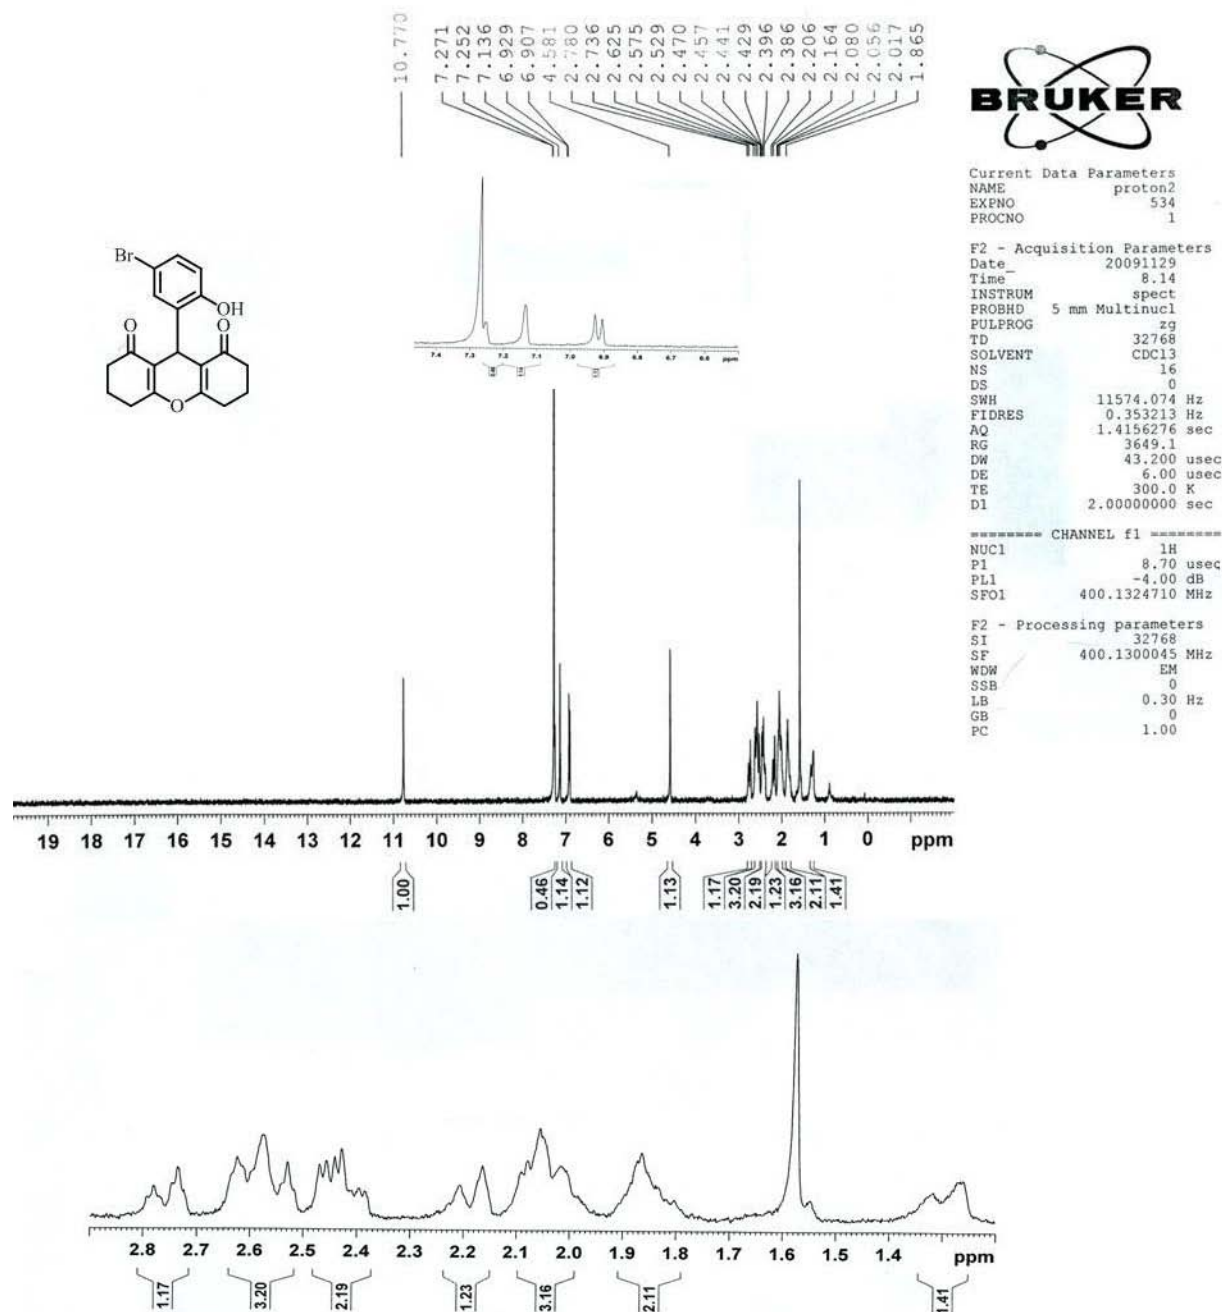

HNMR-Table 1, entry 16

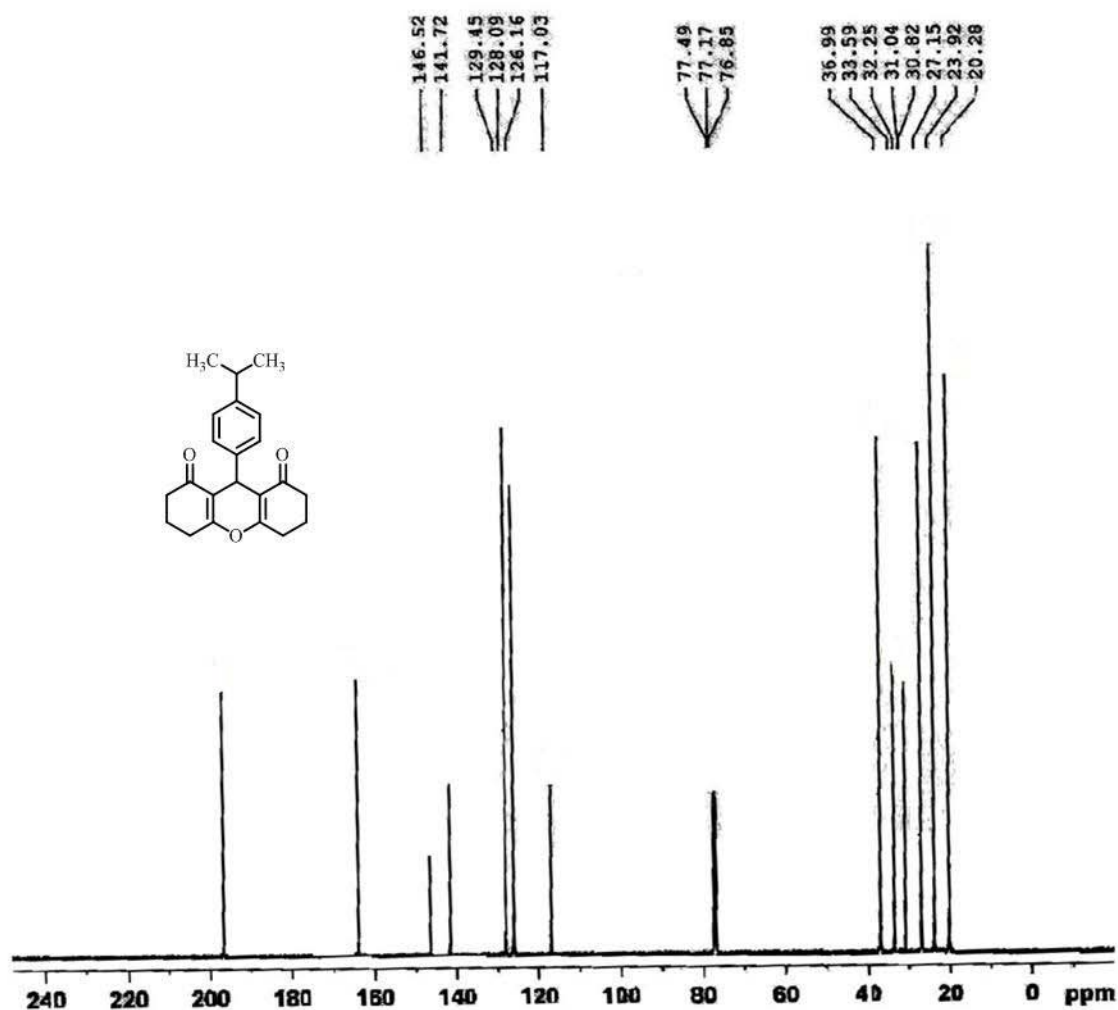

CNMR-Table 1, entry 17

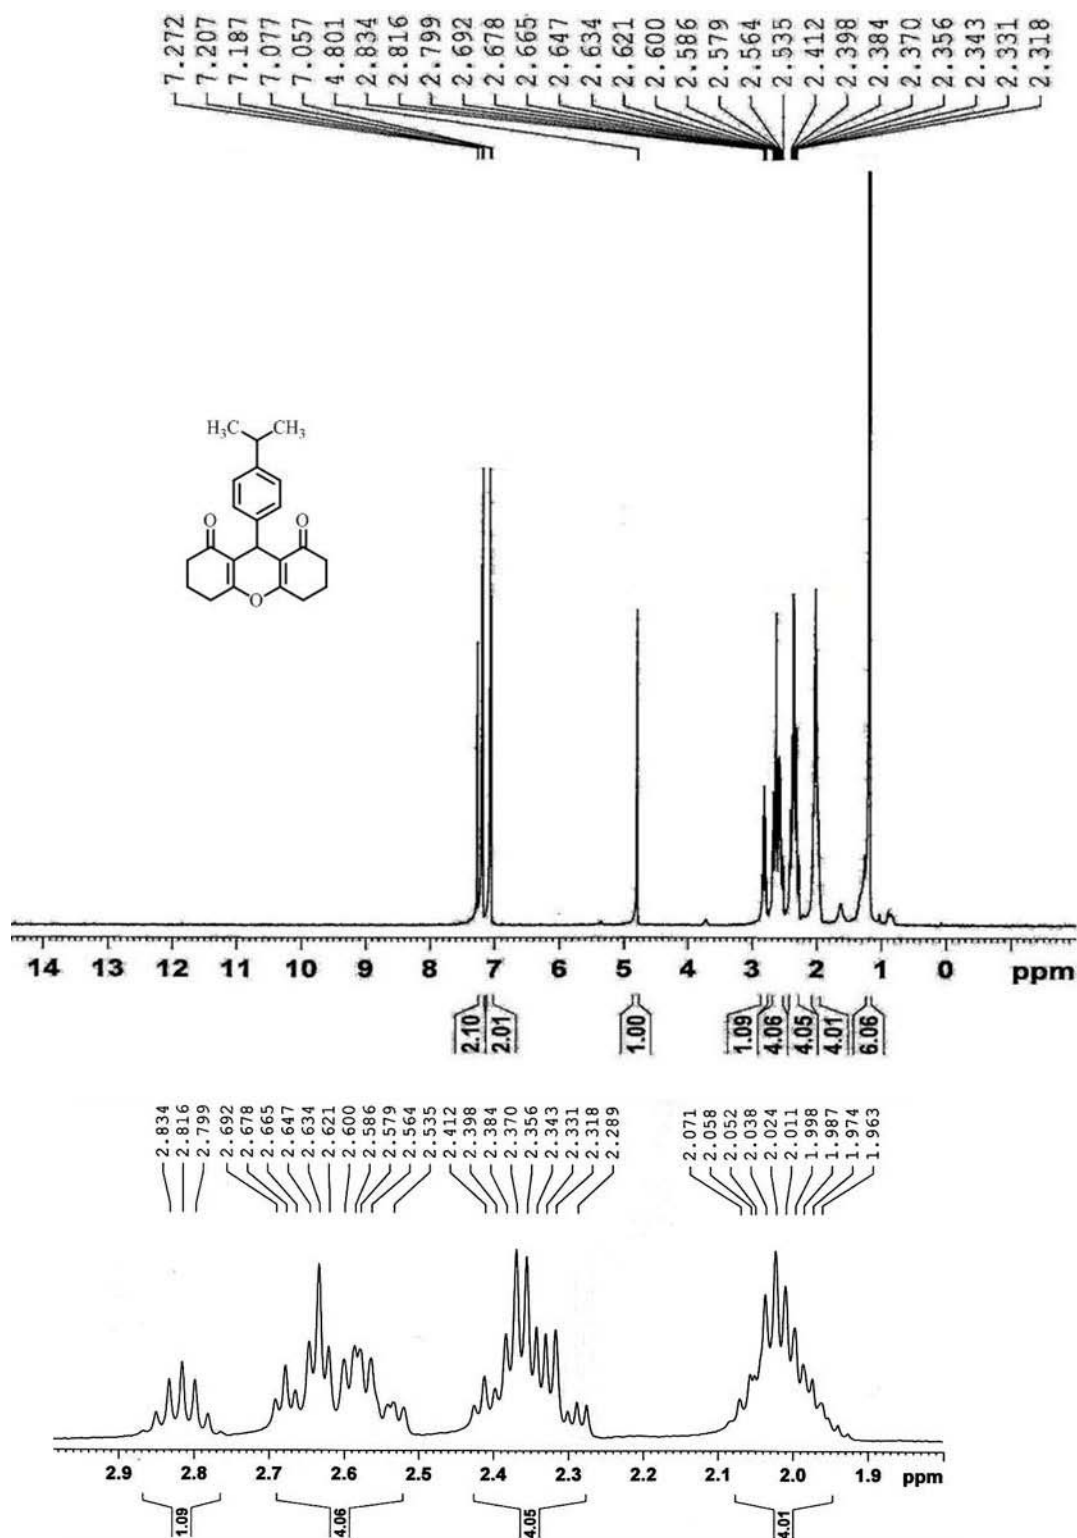

HNMR-Table 1, entry 17

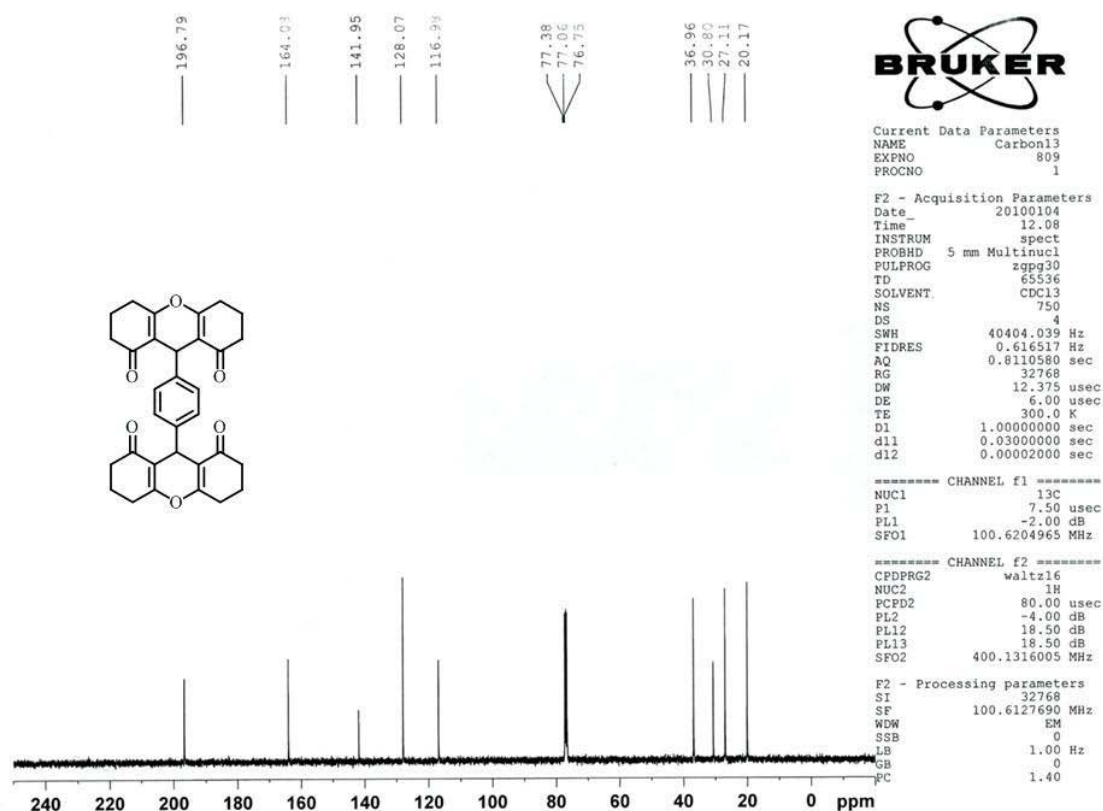

CNMR-Table 1, entry 18

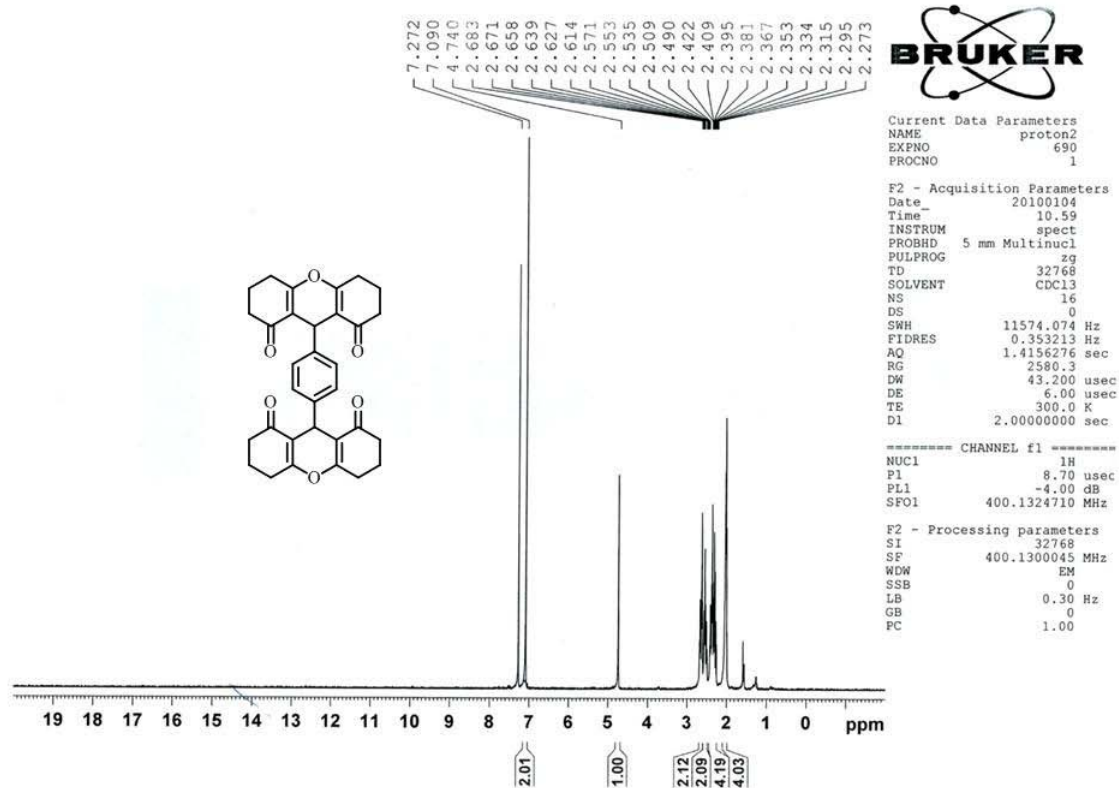

HNMR-Table 1, entry 18
